# Supplementary material for: Meta-Analysis Examining the Importance of Creatine Ingestion Strategies on Lean Tissue Mass and Strength in Older Adults
Source: MDPI journal article supplement (doi:10.3390/nu13061912), 2021-06-02
Supplement: s1 [file s1]

## Supplementary File

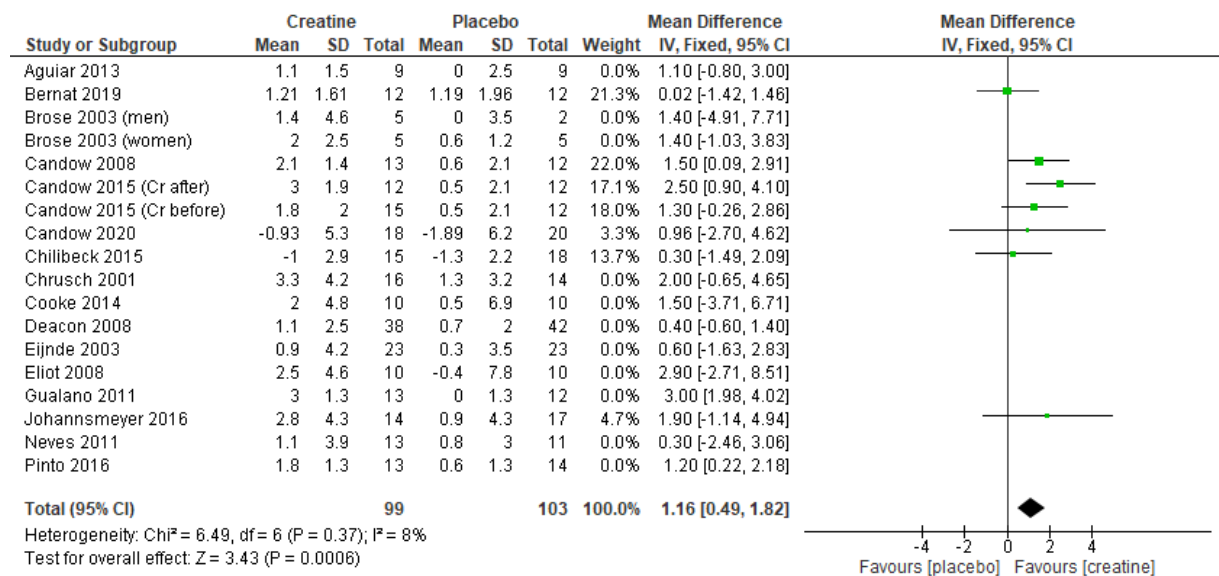

Figure S1: Forest plot for lean tissue mass with the inclusion of only high dose studies that did not include a creatine loading phase.

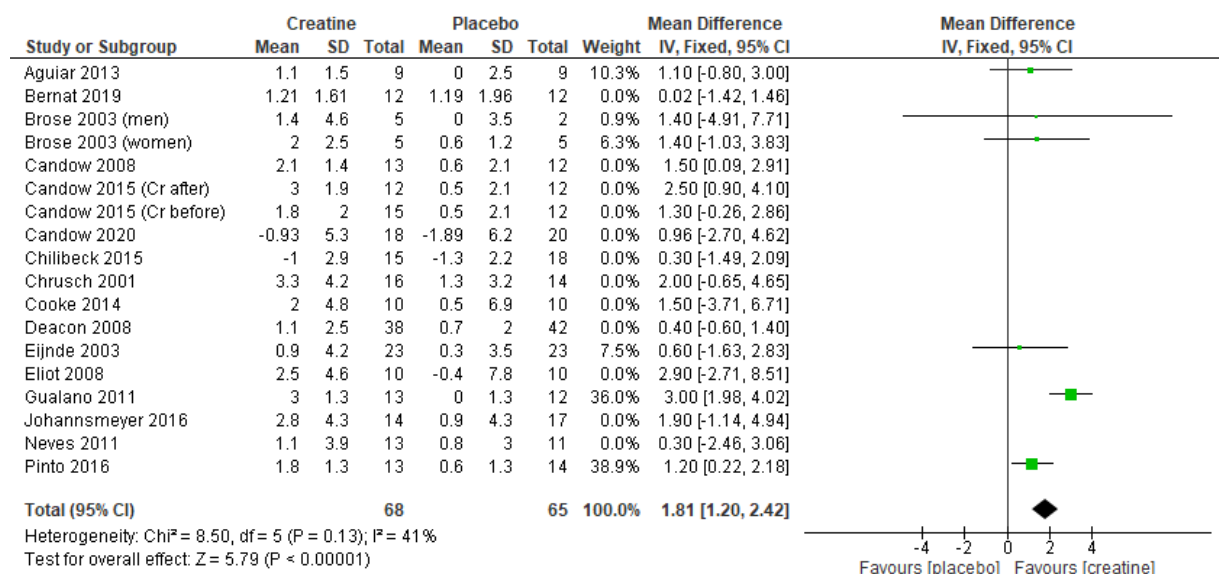

Figure S2: Forest plot for lean tissue mass with the inclusion of only low dose studies that did not include a creatine loading phase.

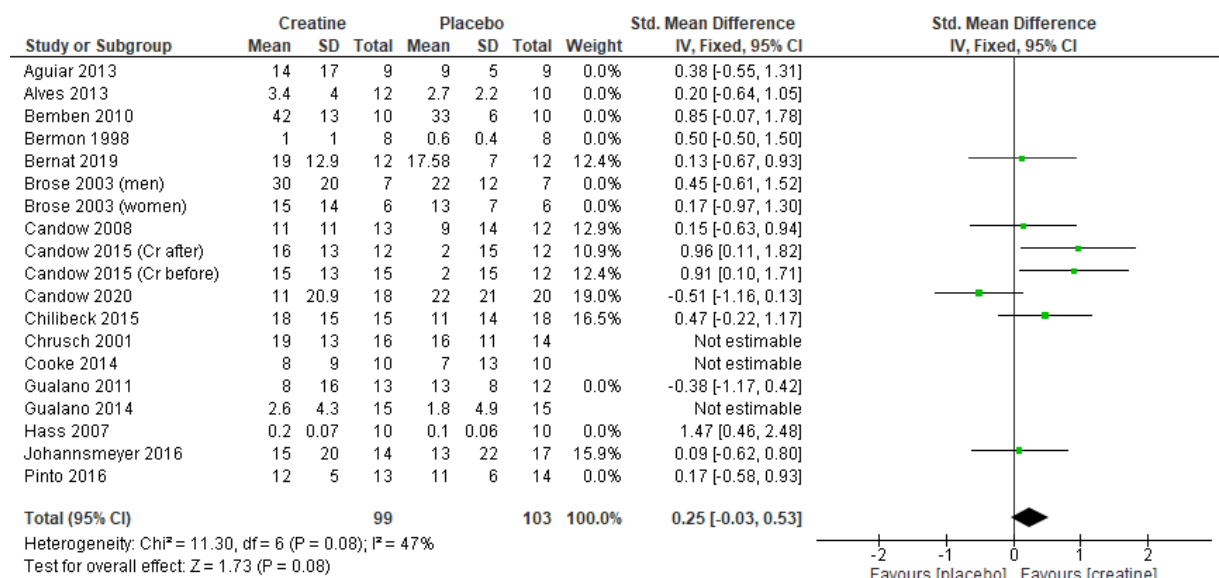

Figure S3: Forest plot for chest press strength with the inclusion of only high dose studies that did not include a creatine loading phase.

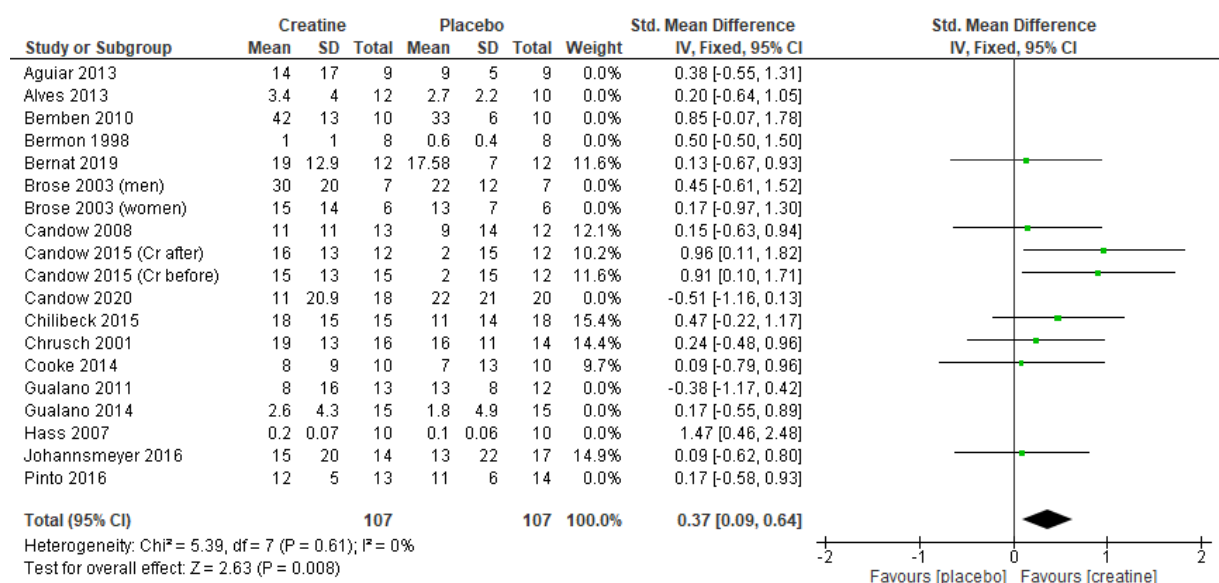

Figure S4: Forest plot for chest muscle strength with the inclusion of only high dose studies (> 5 g/day) with a sensitivity analysis showing that Candow et al. 2020 exclusion significantly altered the findings.

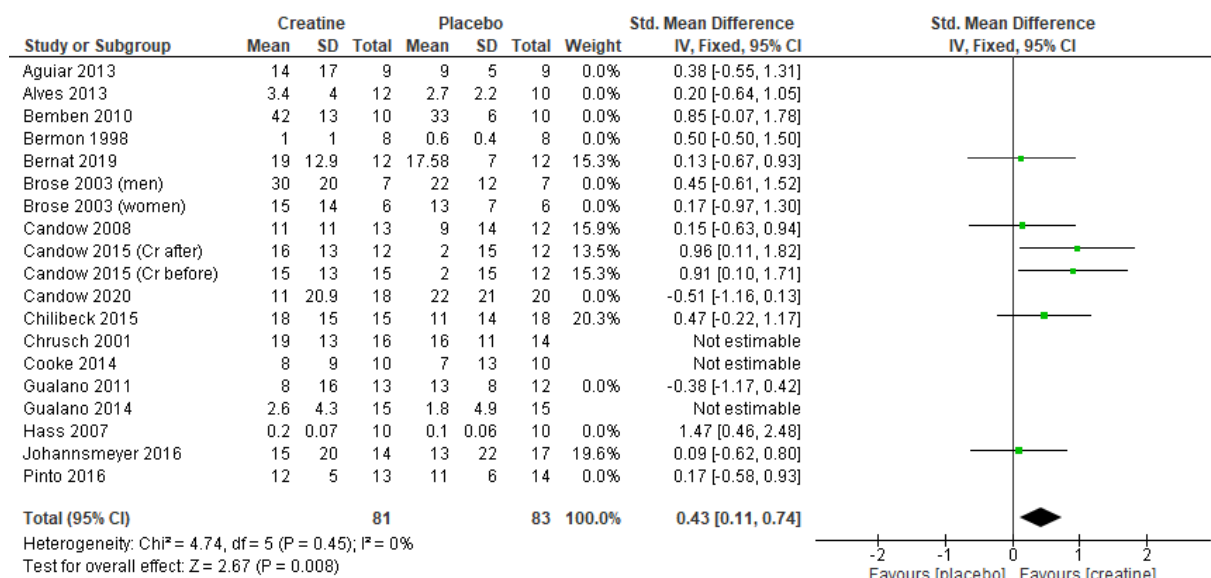

Figure S5: Forest plot for chest muscle strength with the inclusion of only high dose studies (> 5 g/day) that did not include a loading phase with a sensitivity analysis showing that Candow et al. 2020 exclusion significantly altered the findings.

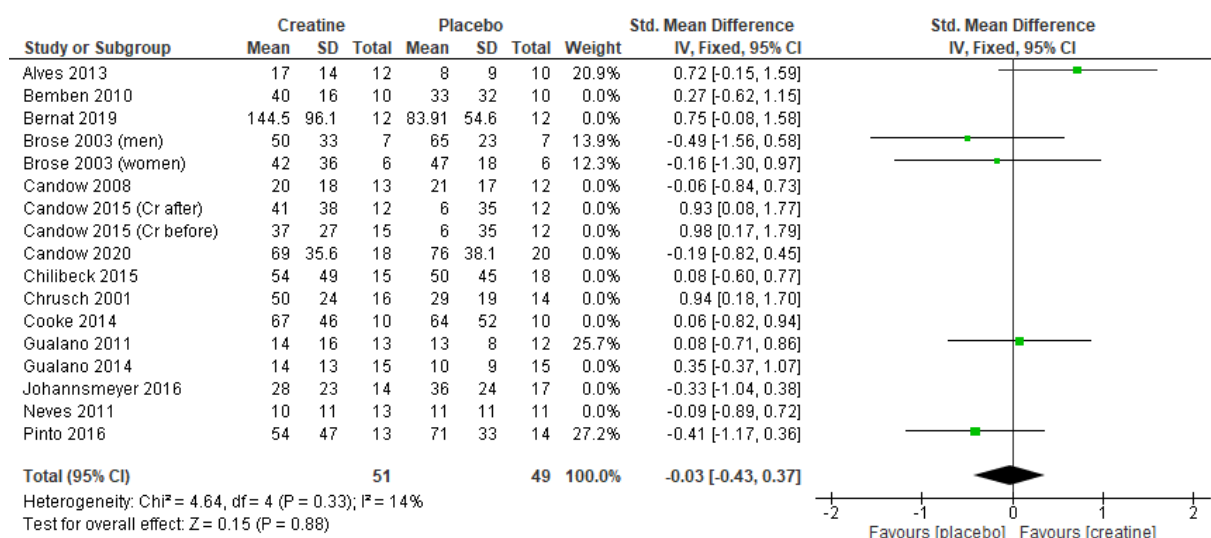

Figure S6: Forest plot for leg press strength with the inclusion of only low dose studies ( $\leq$  5 g/day) that did not include a creatine loading phase.
